# Supplementary material
Source: PubMed Central journal article supplement (PMC10062180)
Supplement: jvi.01664-22-s0001.pdf [file jvi.01664-22-s0001.pdf]

## Supplemental Tables

### Supplemental Table 1

| Group comparison using Tukey's multiple comparisons test                     | P value |
|------------------------------------------------------------------------------|---------|
| <b>Figure 1B</b>                                                             |         |
| 229E spike ( $\alpha$ -CoV) vacc. vs. NL63 spike ( $\alpha$ -CoV) vacc.      | <0.0001 |
| 229E spike ( $\alpha$ -CoV) vacc. vs. OC43 spike ( $\beta$ -CoV) vacc.       | <0.0001 |
| 229E spike ( $\alpha$ -CoV) vacc. vs. HKU1 spike ( $\beta$ -CoV) vacc.       | <0.0001 |
| 229E spike ( $\alpha$ -CoV) vacc. vs. SARS-CoV-2 spike ( $\beta$ -CoV) vacc. | <0.0001 |
| 229E spike ( $\alpha$ -CoV) vacc. vs. neg. contr. (HA) vacc.                 | <0.0001 |
| NL63 spike ( $\alpha$ -CoV) vacc. vs. OC43 spike ( $\beta$ -CoV) vacc.       | <0.0001 |
| NL63 spike ( $\alpha$ -CoV) vacc. vs. HKU1 spike ( $\beta$ -CoV) vacc.       | <0.0001 |
| NL63 spike ( $\alpha$ -CoV) vacc. vs. SARS-CoV-2 spike ( $\beta$ -CoV) vacc. | <0.0001 |
| NL63 spike ( $\alpha$ -CoV) vacc. vs. neg. contr. (HA) vacc.                 | <0.0001 |
| OC43 spike ( $\beta$ -CoV) vacc. vs. HKU1 spike ( $\beta$ -CoV) vacc.        | 0.2214  |
| OC43 spike ( $\beta$ -CoV) vacc. vs. SARS-CoV-2 spike ( $\beta$ -CoV) vacc.  | 0.0268  |
| OC43 spike ( $\beta$ -CoV) vacc. vs. neg. contr. (HA) vacc.                  | 0.9984  |
| HKU1 spike ( $\beta$ -CoV) vacc. vs. SARS-CoV-2 spike ( $\beta$ -CoV) vacc.  | <0.0001 |
| HKU1 spike ( $\beta$ -CoV) vacc. vs. neg. contr. (HA) vacc.                  | 0.0772  |
| SARS-CoV-2 spike ( $\beta$ -CoV) vacc. vs. neg. contr. (HA) vacc.            | 0.0747  |
| <b>Figure 1C</b>                                                             |         |
| 229E spike ( $\alpha$ -CoV) vacc. vs. NL63 spike ( $\alpha$ -CoV) vacc.      | <0.0001 |
| 229E spike ( $\alpha$ -CoV) vacc. vs. OC43 spike ( $\beta$ -CoV) vacc.       | <0.0001 |
| 229E spike ( $\alpha$ -CoV) vacc. vs. HKU1 spike ( $\beta$ -CoV) vacc.       | <0.0001 |
| 229E spike ( $\alpha$ -CoV) vacc. vs. SARS-CoV-2 spike ( $\beta$ -CoV) vacc. | <0.0001 |
| 229E spike ( $\alpha$ -CoV) vacc. vs. neg. contr. (HA) vacc.                 | <0.0001 |
| NL63 spike ( $\alpha$ -CoV) vacc. vs. OC43 spike ( $\beta$ -CoV) vacc.       | <0.0001 |
| NL63 spike ( $\alpha$ -CoV) vacc. vs. HKU1 spike ( $\beta$ -CoV) vacc.       | <0.0001 |
| NL63 spike ( $\alpha$ -CoV) vacc. vs. SARS-CoV-2 spike ( $\beta$ -CoV) vacc. | <0.0001 |
| NL63 spike ( $\alpha$ -CoV) vacc. vs. neg. contr. (HA) vacc.                 | <0.0001 |
| OC43 spike ( $\beta$ -CoV) vacc. vs. HKU1 spike ( $\beta$ -CoV) vacc.        | 0.9820  |
| OC43 spike ( $\beta$ -CoV) vacc. vs. SARS-CoV-2 spike ( $\beta$ -CoV) vacc.  | 0.9179  |
| OC43 spike ( $\beta$ -CoV) vacc. vs. neg. contr. (HA) vacc.                  | 0.1729  |
| HKU1 spike ( $\beta$ -CoV) vacc. vs. SARS-CoV-2 spike ( $\beta$ -CoV) vacc.  | 0.9995  |
| HKU1 spike ( $\beta$ -CoV) vacc. vs. neg. contr. (HA) vacc.                  | 0.4668  |
| SARS-CoV-2 spike ( $\beta$ -CoV) vacc. vs. neg. contr. (HA) vacc.            | 0.6841  |
| <b>Figure 1D</b>                                                             |         |
| 229E spike ( $\alpha$ -CoV) vacc. vs. NL63 spike ( $\alpha$ -CoV) vacc.      | 0.9981  |
| 229E spike ( $\alpha$ -CoV) vacc. vs. OC43 spike ( $\beta$ -CoV) vacc.       | <0.0001 |
| 229E spike ( $\alpha$ -CoV) vacc. vs. HKU1 spike ( $\beta$ -CoV) vacc.       | <0.0001 |
| 229E spike ( $\alpha$ -CoV) vacc. vs. SARS-CoV-2 spike ( $\beta$ -CoV) vacc. | <0.0001 |
| 229E spike ( $\alpha$ -CoV) vacc. vs. neg. contr. (HA) vacc.                 | 0.9180  |
| NL63 spike ( $\alpha$ -CoV) vacc. vs. OC43 spike ( $\beta$ -CoV) vacc.       | <0.0001 |
| NL63 spike ( $\alpha$ -CoV) vacc. vs. HKU1 spike ( $\beta$ -CoV) vacc.       | <0.0001 |
| NL63 spike ( $\alpha$ -CoV) vacc. vs. SARS-CoV-2 spike ( $\beta$ -CoV) vacc. | <0.0001 |
| NL63 spike ( $\alpha$ -CoV) vacc. vs. neg. contr. (HA) vacc.                 | 0.9908  |
| OC43 spike ( $\beta$ -CoV) vacc. vs. HKU1 spike ( $\beta$ -CoV) vacc.        | 0.0002  |
| OC43 spike ( $\beta$ -CoV) vacc. vs. SARS-CoV-2 spike ( $\beta$ -CoV) vacc.  | <0.0001 |
| OC43 spike ( $\beta$ -CoV) vacc. vs. neg. contr. (HA) vacc.                  | <0.0001 |
| HKU1 spike ( $\beta$ -CoV) vacc. vs. SARS-CoV-2 spike ( $\beta$ -CoV) vacc.  | 0.0090  |
| HKU1 spike ( $\beta$ -CoV) vacc. vs. neg. contr. (HA) vacc.                  | <0.0001 |
| SARS-CoV-2 spike ( $\beta$ -CoV) vacc. vs. neg. contr. (HA) vacc.            |         |

|                                                                              |         |
|------------------------------------------------------------------------------|---------|
|                                                                              | <0.0001 |
| Figure 1E                                                                    |         |
| 229E spike ( $\alpha$ -CoV) vacc. vs. NL63 spike ( $\alpha$ -CoV) vacc.      | 0.9809  |
| 229E spike ( $\alpha$ -CoV) vacc. vs. OC43 spike ( $\beta$ -CoV) vacc.       | <0.0001 |
| 229E spike ( $\alpha$ -CoV) vacc. vs. HKU1 spike ( $\beta$ -CoV) vacc.       | <0.0001 |
| 229E spike ( $\alpha$ -CoV) vacc. vs. SARS-CoV-2 spike ( $\beta$ -CoV) vacc. | <0.0001 |
| 229E spike ( $\alpha$ -CoV) vacc. vs. neg. contr. (HA) vacc.                 | 0.1351  |
| NL63 spike ( $\alpha$ -CoV) vacc. vs. OC43 spike ( $\beta$ -CoV) vacc.       | <0.0001 |
| NL63 spike ( $\alpha$ -CoV) vacc. vs. HKU1 spike ( $\beta$ -CoV) vacc.       | <0.0001 |
| NL63 spike ( $\alpha$ -CoV) vacc. vs. SARS-CoV-2 spike ( $\beta$ -CoV) vacc. | <0.0001 |
| NL63 spike ( $\alpha$ -CoV) vacc. vs. neg. contr. (HA) vacc.                 | 0.0187  |
| OC43 spike ( $\beta$ -CoV) vacc. vs. HKU1 spike ( $\beta$ -CoV) vacc.        | <0.0001 |
| OC43 spike ( $\beta$ -CoV) vacc. vs. SARS-CoV-2 spike ( $\beta$ -CoV) vacc.  | 0.2235  |
| OC43 spike ( $\beta$ -CoV) vacc. vs. neg. contr. (HA) vacc.                  | <0.0001 |
| HKU1 spike ( $\beta$ -CoV) vacc. vs. SARS-CoV-2 spike ( $\beta$ -CoV) vacc.  | <0.0001 |
| HKU1 spike ( $\beta$ -CoV) vacc. vs. neg. contr. (HA) vacc.                  | <0.0001 |
| SARS-CoV-2 spike ( $\beta$ -CoV) vacc. vs. neg. contr. (HA) vacc.            | <0.0001 |
| Figure 1F                                                                    |         |
| 229E spike ( $\alpha$ -CoV) vacc. vs. NL63 spike ( $\alpha$ -CoV) vacc.      | 0.1735  |
| 229E spike ( $\alpha$ -CoV) vacc. vs. OC43 spike ( $\beta$ -CoV) vacc.       | <0.0001 |
| 229E spike ( $\alpha$ -CoV) vacc. vs. HKU1 spike ( $\beta$ -CoV) vacc.       | <0.0001 |
| 229E spike ( $\alpha$ -CoV) vacc. vs. SARS-CoV-2 spike ( $\beta$ -CoV) vacc. | <0.0001 |
| 229E spike ( $\alpha$ -CoV) vacc. vs. neg. contr. (HA) vacc.                 | 0.9998  |
| NL63 spike ( $\alpha$ -CoV) vacc. vs. OC43 spike ( $\beta$ -CoV) vacc.       | <0.0001 |
| NL63 spike ( $\alpha$ -CoV) vacc. vs. HKU1 spike ( $\beta$ -CoV) vacc.       | <0.0001 |
| NL63 spike ( $\alpha$ -CoV) vacc. vs. SARS-CoV-2 spike ( $\beta$ -CoV) vacc. | <0.0001 |
| NL63 spike ( $\alpha$ -CoV) vacc. vs. neg. contr. (HA) vacc.                 | 0.1018  |
| OC43 spike ( $\beta$ -CoV) vacc. vs. HKU1 spike ( $\beta$ -CoV) vacc.        | 0.9861  |
| OC43 spike ( $\beta$ -CoV) vacc. vs. SARS-CoV-2 spike ( $\beta$ -CoV) vacc.  | <0.0001 |
| OC43 spike ( $\beta$ -CoV) vacc. vs. neg. contr. (HA) vacc.                  | <0.0001 |
| HKU1 spike ( $\beta$ -CoV) vacc. vs. SARS-CoV-2 spike ( $\beta$ -CoV) vacc.  | <0.0001 |
| HKU1 spike ( $\beta$ -CoV) vacc. vs. neg. contr. (HA) vacc.                  | <0.0001 |
| SARS-CoV-2 spike ( $\beta$ -CoV) vacc. vs. neg. contr. (HA) vacc.            | <0.0001 |
| Figure 1G                                                                    |         |
| 229E spike ( $\alpha$ -CoV) vacc. vs. NL63 spike ( $\alpha$ -CoV) vacc.      | >0.9999 |
| 229E spike ( $\alpha$ -CoV) vacc. vs. OC43 spike ( $\beta$ -CoV) vacc.       | >0.9999 |
| 229E spike ( $\alpha$ -CoV) vacc. vs. HKU1 spike ( $\beta$ -CoV) vacc.       | 0.6268  |
| 229E spike ( $\alpha$ -CoV) vacc. vs. SARS-CoV-2 spike ( $\beta$ -CoV) vacc. | <0.0001 |
| 229E spike ( $\alpha$ -CoV) vacc. vs. neg. contr. (HA) vacc.                 | >0.9999 |
| NL63 spike ( $\alpha$ -CoV) vacc. vs. OC43 spike ( $\beta$ -CoV) vacc.       | >0.9999 |
| NL63 spike ( $\alpha$ -CoV) vacc. vs. HKU1 spike ( $\beta$ -CoV) vacc.       | 0.6268  |
| NL63 spike ( $\alpha$ -CoV) vacc. vs. SARS-CoV-2 spike ( $\beta$ -CoV) vacc. | <0.0001 |
| NL63 spike ( $\alpha$ -CoV) vacc. vs. neg. contr. (HA) vacc.                 | >0.9999 |
| OC43 spike ( $\beta$ -CoV) vacc. vs. HKU1 spike ( $\beta$ -CoV) vacc.        | 0.6268  |
| OC43 spike ( $\beta$ -CoV) vacc. vs. SARS-CoV-2 spike ( $\beta$ -CoV) vacc.  | <0.0001 |
| OC43 spike ( $\beta$ -CoV) vacc. vs. neg. contr. (HA) vacc.                  | >0.9999 |
| HKU1 spike ( $\beta$ -CoV) vacc. vs. SARS-CoV-2 spike ( $\beta$ -CoV) vacc.  | 0.0063  |
| HKU1 spike ( $\beta$ -CoV) vacc. vs. neg. contr. (HA) vacc.                  | 0.6268  |
| SARS-CoV-2 spike ( $\beta$ -CoV) vacc. vs. neg. contr. (HA) vacc.            | <0.0001 |

**Supplemental Table 2**

| Group comparison using Tukey's multiple comparisons test                     | P value |
|------------------------------------------------------------------------------|---------|
| <b>Figure 2A</b>                                                             |         |
| 229E spike ( $\alpha$ -CoV) vacc. vs. NL63 spike ( $\alpha$ -CoV) vacc.      | 0.9994  |
| 229E spike ( $\alpha$ -CoV) vacc. vs. OC43 spike ( $\beta$ -CoV) vacc.       | 0.7767  |
| 229E spike ( $\alpha$ -CoV) vacc. vs. HKU1 spike ( $\beta$ -CoV) vacc.       | 0.8858  |
| 229E spike ( $\alpha$ -CoV) vacc. vs. SARS-CoV-2 spike ( $\beta$ -CoV) vacc. | <0.0001 |
| 229E spike ( $\alpha$ -CoV) vacc. vs. neg. contr. (HA) vacc.                 | 0.9606  |
| NL63 spike ( $\alpha$ -CoV) vacc. vs. OC43 spike ( $\beta$ -CoV) vacc.       | 0.9194  |
| NL63 spike ( $\alpha$ -CoV) vacc. vs. HKU1 spike ( $\beta$ -CoV) vacc.       | 0.9733  |
| NL63 spike ( $\alpha$ -CoV) vacc. vs. SARS-CoV-2 spike ( $\beta$ -CoV) vacc. | <0.0001 |
| NL63 spike ( $\alpha$ -CoV) vacc. vs. neg. contr. (HA) vacc.                 | 0.8557  |
| OC43 spike ( $\beta$ -CoV) vacc. vs. HKU1 spike ( $\beta$ -CoV) vacc.        | 0.9999  |
| OC43 spike ( $\beta$ -CoV) vacc. vs. SARS-CoV-2 spike ( $\beta$ -CoV) vacc.  | <0.0001 |
| OC43 spike ( $\beta$ -CoV) vacc. vs. neg. contr. (HA) vacc.                  | 0.2971  |
| HKU1 spike ( $\beta$ -CoV) vacc. vs. SARS-CoV-2 spike ( $\beta$ -CoV) vacc.  | <0.0001 |
| HKU1 spike ( $\beta$ -CoV) vacc. vs. neg. contr. (HA) vacc.                  | 0.4196  |
| SARS-CoV-2 spike ( $\beta$ -CoV) vacc. vs. neg. contr. (HA) vacc.            | <0.0001 |
| <b>Figure 2C</b>                                                             |         |
| 229E spike ( $\alpha$ -CoV) vacc. vs. NL63 spike ( $\alpha$ -CoV) vacc.      | 0.9171  |
| 229E spike ( $\alpha$ -CoV) vacc. vs. OC43 spike ( $\beta$ -CoV) vacc.       | 0.9569  |
| 229E spike ( $\alpha$ -CoV) vacc. vs. HKU1 spike ( $\beta$ -CoV) vacc.       | 0.9806  |
| 229E spike ( $\alpha$ -CoV) vacc. vs. SARS-CoV-2 spike ( $\beta$ -CoV) vacc. | <0.0001 |
| 229E spike ( $\alpha$ -CoV) vacc. vs. neg. contr. (HA) vacc.                 | 0.2900  |
| NL63 spike ( $\alpha$ -CoV) vacc. vs. OC43 spike ( $\beta$ -CoV) vacc.       | >0.9999 |
| NL63 spike ( $\alpha$ -CoV) vacc. vs. HKU1 spike ( $\beta$ -CoV) vacc.       | 0.9997  |
| NL63 spike ( $\alpha$ -CoV) vacc. vs. SARS-CoV-2 spike ( $\beta$ -CoV) vacc. | <0.0001 |
| NL63 spike ( $\alpha$ -CoV) vacc. vs. neg. contr. (HA) vacc.                 | 0.8522  |
| OC43 spike ( $\beta$ -CoV) vacc. vs. HKU1 spike ( $\beta$ -CoV) vacc.        | >0.9999 |
| OC43 spike ( $\beta$ -CoV) vacc. vs. SARS-CoV-2 spike ( $\beta$ -CoV) vacc.  | <0.0001 |
| OC43 spike ( $\beta$ -CoV) vacc. vs. neg. contr. (HA) vacc.                  | 0.7784  |
| HKU1 spike ( $\beta$ -CoV) vacc. vs. SARS-CoV-2 spike ( $\beta$ -CoV) vacc.  | <0.0001 |
| HKU1 spike ( $\beta$ -CoV) vacc. vs. neg. contr. (HA) vacc.                  | 0.6963  |
| SARS-CoV-2 spike ( $\beta$ -CoV) vacc. vs. neg. contr. (HA) vacc.            | <0.0001 |

**Supplemental Table 3**

| Pre/post challenge comparison, t-test | P value |
|---------------------------------------|---------|
| <b>Figure 2C</b>                      |         |
| 229E spike ( $\alpha$ -CoV)           | <0.0001 |
| NL63 spike ( $\alpha$ -CoV)           | <0.0001 |
| OC43 spike ( $\beta$ -CoV)            | <0.0001 |
| HKU1 spike ( $\beta$ -CoV)            | 0.0003  |
| SARS-CoV-2 spike ( $\beta$ -CoV)      | 0.2010  |
| neg. contr. (HA)                      | <0.0001 |
| <b>Figure 2D</b>                      |         |
| 229E spike ( $\alpha$ -CoV)           | 0.0046  |
| NL63 spike ( $\alpha$ -CoV)           | 0.6519  |
| OC43 spike ( $\beta$ -CoV)            | 0.0507  |
| HKU1 spike ( $\beta$ -CoV)            | 0.0014  |
| SARS-CoV-2 spike ( $\beta$ -CoV)      | 0.0917  |

|                                  |         |
|----------------------------------|---------|
| neg. contr. (HA)                 | 0.1586  |
| Figure 2E                        |         |
| 229E spike ( $\alpha$ -CoV)      | 0.7836  |
| NL63 spike ( $\alpha$ -CoV)      | 0.6472  |
| OC43 spike ( $\beta$ -CoV)       | 0.7076  |
| HKU1 spike ( $\beta$ -CoV)       | 0.1493  |
| SARS-CoV-2 spike ( $\beta$ -CoV) | 0.7036  |
| neg. contr. (HA)                 | 0.6119  |
| Figure 2F                        |         |
| 229E spike ( $\alpha$ -CoV)      | 0.3442  |
| NL63 spike ( $\alpha$ -CoV)      | 0.8733  |
| OC43 spike ( $\beta$ -CoV)       | 0.1553  |
| HKU1 spike ( $\beta$ -CoV)       | 0.5709  |
| SARS-CoV-2 spike ( $\beta$ -CoV) | 0.0212  |
| neg. contr. (HA)                 | 0.0004  |
| Figure 2G                        |         |
| 229E spike ( $\alpha$ -CoV)      | <0.0001 |
| NL63 spike ( $\alpha$ -CoV)      | <0.0001 |
| OC43 spike ( $\beta$ -CoV)       | 0.2383  |
| HKU1 spike ( $\beta$ -CoV)       | 0.1213  |
| SARS-CoV-2 spike ( $\beta$ -CoV) | 0.8895  |
| neg. contr. (HA)                 | 0.0002  |

**Supplemental Table 4**

| Group comparison using Tukey's multiple comparisons test | P value |
|----------------------------------------------------------|---------|
| Figure 3B                                                |         |
| 229E spike vs. NL63 spike                                | 0.8097  |
| 229E spike vs. OC43 spike                                | 0.9994  |
| 229E spike vs. HKU1 spike                                | 0.6685  |
| 229E spike vs. SARS-CoV-2 spike                          | <0.0001 |
| 229E spike vs. neg. contr. (HA)                          | >0.9999 |
| 229E spike vs. naive contr.                              | <0.0001 |
| NL63 spike vs. OC43 spike                                | 0.9556  |
| NL63 spike vs. HKU1 spike                                | 0.0862  |
| NL63 spike vs. SARS-CoV-2 spike                          | <0.0001 |
| NL63 spike vs. neg. contr. (HA)                          | 0.8878  |
| NL63 spike vs. naive contr.                              | <0.0001 |
| OC43 spike vs. HKU1 spike                                | 0.3860  |
| OC43 spike vs. SARS-CoV-2 spike                          | <0.0001 |
| OC43 spike vs. neg. contr. (HA)                          | 0.9998  |
| OC43 spike vs. naive contr.                              | <0.0001 |
| HKU1 spike vs. SARS-CoV-2 spike                          | <0.0001 |
| HKU1 spike vs. neg. contr. (HA)                          | 0.7986  |
| HKU1 spike vs. naive contr.                              | <0.0001 |
| SARS-CoV-2 spike vs. neg. contr. (HA)                    | <0.0001 |
| SARS-CoV-2 spike vs. naive contr.                        | <0.0001 |
| neg. contr. (HA) vs. naive contr.                        | <0.0001 |
| Figure 3C                                                |         |
| 229E spike vs. NL63 spike                                | 0.8676  |
| 229E spike vs. OC43 spike                                | 0.9961  |
| 229E spike vs. HKU1 spike                                | >0.9999 |

|                                       |         |
|---------------------------------------|---------|
| 229E spike vs. SARS-CoV-2 spike       | <0.0001 |
| 229E spike vs. neg. contr. (HA)       | >0.9999 |
| NL63 spike vs. OC43 spike             | 0.9811  |
| NL63 spike vs. HKU1 spike             | 0.9088  |
| NL63 spike vs. SARS-CoV-2 spike       | <0.0001 |
| NL63 spike vs. neg. contr. (HA)       | 0.8680  |
| OC43 spike vs. HKU1 spike             | 0.9990  |
| OC43 spike vs. SARS-CoV-2 spike       | <0.0001 |
| OC43 spike vs. neg. contr. (HA)       | 0.9896  |
| HKU1 spike vs. SARS-CoV-2 spike       | <0.0001 |
| HKU1 spike vs. neg. contr. (HA)       | 0.9995  |
| SARS-CoV-2 spike vs. neg. contr. (HA) | 0.0002  |

Figure 3D

|                                       |         |
|---------------------------------------|---------|
| 229E spike vs. NL63 spike             | >0.9999 |
| 229E spike vs. OC43 spike             | >0.9999 |
| 229E spike vs. HKU1 spike             | >0.9999 |
| 229E spike vs. SARS-CoV-2 spike       | >0.9999 |
| 229E spike vs. neg. contr. (HA)       | >0.9999 |
| 229E spike vs. naive contr.           | <0.0001 |
| NL63 spike vs. OC43 spike             | >0.9999 |
| NL63 spike vs. HKU1 spike             | >0.9999 |
| NL63 spike vs. SARS-CoV-2 spike       | >0.9999 |
| NL63 spike vs. neg. contr. (HA)       | >0.9999 |
| NL63 spike vs. naive contr.           | <0.0001 |
| OC43 spike vs. HKU1 spike             | >0.9999 |
| OC43 spike vs. SARS-CoV-2 spike       | >0.9999 |
| OC43 spike vs. neg. contr. (HA)       | >0.9999 |
| OC43 spike vs. naive contr.           | <0.0001 |
| HKU1 spike vs. SARS-CoV-2 spike       | >0.9999 |
| HKU1 spike vs. neg. contr. (HA)       | >0.9999 |
| HKU1 spike vs. naive contr.           | <0.0001 |
| SARS-CoV-2 spike vs. neg. contr. (HA) | >0.9999 |
| SARS-CoV-2 spike vs. naive contr.     | <0.0001 |
| neg. contr. (HA) vs. naive contr.     | <0.0001 |

Figure 3E

|                                 |         |
|---------------------------------|---------|
| 229E spike vs. NL63 spike       | >0.9999 |
| 229E spike vs. OC43 spike       | >0.9999 |
| 229E spike vs. HKU1 spike       | >0.9999 |
| 229E spike vs. SARS-CoV-2 spike | >0.9999 |
| 229E spike vs. neg. contr. (HA) | >0.9999 |
| 229E spike vs. naive contr.     | <0.0001 |
| NL63 spike vs. OC43 spike       | >0.9999 |
| NL63 spike vs. HKU1 spike       | >0.9999 |
| NL63 spike vs. SARS-CoV-2 spike | >0.9999 |
| NL63 spike vs. neg. contr. (HA) | >0.9999 |
| NL63 spike vs. naive contr.     | <0.0001 |
| OC43 spike vs. HKU1 spike       | >0.9999 |
| OC43 spike vs. SARS-CoV-2 spike | >0.9999 |
| OC43 spike vs. neg. contr. (HA) | >0.9999 |
| OC43 spike vs. naive contr.     | <0.0001 |
| HKU1 spike vs. SARS-CoV-2 spike | >0.9999 |
| HKU1 spike vs. neg. contr. (HA) | >0.9999 |

|                                       |         |
|---------------------------------------|---------|
| HKU1 spike vs. naive contr.           | <0.0001 |
| SARS-CoV-2 spike vs. neg. contr. (HA) | >0.9999 |
| SARS-CoV-2 spike vs. naive contr.     | <0.0001 |
| neg. contr. (HA) vs. naive contr.     | <0.0001 |
